# Supplementary material for: Affibody-targeted fluorogen activating protein for in vivo tumor imaging
Source: Royal Society of Chemistry journal article supplement (doi:10.1039/c6cc09137g), 2017-01-01
Supplement: c6cc09137g1.pdf [file c6cc09137g1.pdf]

Supplementary online material for:

### Affibody-Targeted Fluorogen Activating Protein for *in vivo* Tumor Imaging

Yi Wang<sup>a,b</sup>, Byron Ballou<sup>b</sup>, Brigitte F Schmidt<sup>b</sup>, Sue Andreko<sup>b</sup>, Claudette M. St. Croix<sup>c</sup>, Simon C. Watkins<sup>c</sup>, Marcel P Bruchez<sup>a,b,d</sup>

<sup>a</sup>The Department of Biological Sciences, Carnegie Mellon University, Pittsburgh, PA, 15213, USA <sup>b</sup>The Molecular Biosensor and Imaging Center, Carnegie Mellon University, Pittsburgh, PA, 15213 USA <sup>c</sup>Center for Biologic Imaging, University of Pittsburgh, PA 15261 <sup>d</sup>The Department of Chemistry, Carnegie Mellon University, Pittsburgh, PA, 1513, USA

Correspondence should be addressed to M.P.B. (bruchez@cmu.edu)

### Material and Methods

**Preparation of probes.** AffiFAP targeting probes were constructed as one dL5\*\* flanked by two copies of affibody with an additional C-terminal cysteine. EGFR affibody (Z<sub>EGFR:1907</sub>) and HER2 affibody (Z<sub>HER2:342</sub>)<sup>1-3</sup> were used in this experiment. Cy5-maleimide was conjugated to the EGFR-specific affiFAP through the C-terminal cysteine. Cloning, purification and conjugation were described previously<sup>4</sup>. Sequences below show affibody amino acids underlined and FAP amino acids in boldface.

Her2 affiFAP: Addgene 85624 (Z<sub>Her2-342</sub>, **FAP dL5\*\***)

GPSKLASVENKFNKEMRNAYWEIALLPNLNNQKRAFIRSLYDDPSQSANLLAEAKKLNDQAQPKQAVVTQEPSVTVSPGGTVILTCG  
**SGTGAVTSGHYANWFQQKPGQAPRALIFD**TDKKYSWTPGRFSGSLLGAKAALTISDAQPEDEAEYYCSLSDVDGYLFGGGTQLTVL  
**SGGGGSGGGGSGGGGSGGGG**SQAVVTQEPSVTVSPGGTVILTCGSGTGAVTSGHYANWFQQKPGQAPRALIFDTDKKYSWTPG  
**RFSGSLGAKAALTISDAQPEDEAEYYCSLSDVDGYLFGGGTQLTVLS**GSTSGTVENKFNKEMRNAYWEIALLPNLNNQKRAFIRSLY  
DDPSQSANLLAEAKKLNDQAQPK

EGFR affiFAP: Addgene 73217 (Z<sub>EGFR-1907</sub>, **FAP dL5\*\***)

GPSKLASAEAKYAKEMWAAWEEIRNLPNLGTWQMTAFIAKLVDDDPSQSSELLSEAKKLNDSQAPKQAVVTQEPSVTVSPGGTVILTC  
**GSGTGAVTSGHYANWFQQKPGQAPRALIFD**TDKKYSWTPGRFSGSLLGAKAALTISDAQPEDEAEYYCSLSDVDGYLFGGGTQLTV  
**LSGGGGSGGGGSGGGGSGGGG**SQAVVTQEPSVTVSPGGTVILTCGSGTGAVTSGHYANWFQQKPGQAPRALIFDTDKKYSWTPG  
**RFSGSLGAKAALTISDAQPEDEAEYYCSLSDVDGYLFGGGTQLTVLS**GSTSGTAEAKYAKEMWAAWEEIRNLPNLGTWQMTAFIA  
KLVDDDPSQSSELLSEAKKLNDSQAPK

**Dye synthesis.** MG-Btau was synthesized as described previously, without modification.<sup>5</sup>

**Cell culture and tumor model.** Protocols for animal use were reviewed and approved by the Institutional Animal Care and Use Committee of Carnegie Mellon University. A431 cells (ATCC CRL-1555) were cultured in DMEM (Thermo Fisher) supplemented with 10% FBS (FisherBrand) at 37°C in humidified air containing 5% CO<sub>2</sub>. EGFR-enriched tumor models were established in athymic nude mice (athymic nudes; Envigo). Suspended A431 cells (5x10<sup>6</sup> cells in 50-100 µL of PBS) were inoculated subcutaneously into the right thighs of the animals. Animals were used for experiment 10-15 days post-inoculation when tumors were >1 cm in size (length + width).

***In vivo* tumor imaging.** Probes were introduced to mice through tail-vein injection at a concentration selected to achieve a final dose of 200 nM in circulation. An IVIS Spectrum CT Optical Imaging System (Perkin Elmer) was used for *in vivo* imaging with an excitation filter of 640/20 nm and emission filter of 680/20 nm to capture tumor fluorescence images. Images obtained with 535/20 nm excitation and 680/20 nm emission filters were used as fluorescence background and subtracted. Once mice were sacrificed, organs were harvested for fluorescence detection. Tumors were weighed and cryogenically stored in OCT compound at -80°C.

**Tumor section fluorescence imaging.** Collected tumors were cyro-sectioned into 10  $\mu\text{m}$  slices. The sections were stained with Hoechst and Alexa488-phalloidin and then mounted with PBS. The mounted tumor sections were imaged by a Nikon Eclipse Ti Slidescanning system with a 10x 0.5NA objective. Widefield fluorescence images were collected using appropriate spectral windows for each probe: 405 nm ex/460 nm em for Hoechst 33342, 480 nm ex/530 nm em for Alexa 488, 640 nm ex/680 nm em for MG and Cy5, and images were collected with a Hamamatsu Orca Flash 4.0 camera.

**Probe half-life measurement.** Swiss Webster female mice were used to determine the half-life of affiFAP and MG. A dose sufficient to achieve 200 nM of the final construct in the blood pool (assuming 1.5 mL total blood volume) was tail-vein injected and blood samples (typically 20ml) were collected by submandibular bleeding<sup>6</sup> using heparinized capillary tubes at different time points. Plasma was isolated using a plasma separation wax (from BD Vacutainer serum collection vials) and a hemocentrifuge. 5  $\mu\text{L}$  of plasma was complexed with 15  $\mu\text{L}$  of 50  $\mu\text{M}$  dL5\*\* or MG-Btau and the fluorescence was measured by Tecan Infinite M1000 plate spectrometer using 636nm excitation and 664nm emission.

## References

1. M. Friedman, E. Nordberg, I. Hoiden-Guthenberg, H. Brismar, G. P. Adams, F. Y. Nilsson, J. Carlsson and S. Stahl, *Protein Eng Des Sel*, 2007, **20**, 189-199.
2. H. Gong, J. Kovar, G. Little, H. Chen and D. M. Olive, *Neoplasia*, 2010, **12**, 139-149.
3. S. B. Lee, M. Hassan, R. Fisher, O. Chertov, V. Chernomordik, G. Kramer-Marek, A. Gandjbakhche and J. Capala, *Clinical cancer research : an official journal of the American Association for Cancer Research*, 2008, **14**, 3840-3849.
4. Y. Wang, C. A. Telmer, B. F. Schmidt, J. D. Franke, S. Ort, D. J. Arndt-Jovin and M. P. Bruchez, *Bioconjugate chemistry*, 2015, **26**, 137-144.
5. Q. Yan, B. F. Schmidt, L. A. Perkins, M. Naganbabu, S. Saurabh, S. K. Andreko and M. P. Bruchez, *Org Biomol Chem*, 2015, **13**, 2078-2086.
6. W. T. Golde, P. Gollobin and L. L. Rodriguez, *Lab animal*, 2005, **34**, 39.
